# Supplementary material
Source: publisher figshare collection journal article supplement (https://karger.figshare.com/articles/dataset/_/4047534)
Supplement: Supplementary file 1 [file 1]

Archive with 8 entries (8 files):
- CGR9282_Supple_Table2.pdf
- CGR9282_Supple_Table1.pdf
- CGR9282_Supple_Fig6.tif
- CGR9282_Supple_Fig5.tif
- CGR9282_Supple_Fig4.tif
- CGR9282_Supple_Fig3.tif
- CGR9282_Supple_Fig2.tif
- CGR9282_Supple_Fig1.tif
