# Supplementary material
Source: publisher figshare collection journal article supplement (https://karger.figshare.com/articles/dataset/_/4047534)
Supplement: Supplementary file 1 [file 1 › CGR9282_Supple_Table2.pdf]

**Supplementary table 2** Karyotypic formulas of the subclones (A, B, C) presently found in CLS-ACI-1

| Subclone | Karyotype                                                                                                                                                                                                                                                                                                                                                                                                                                                                                                                                       |
|----------|-------------------------------------------------------------------------------------------------------------------------------------------------------------------------------------------------------------------------------------------------------------------------------------------------------------------------------------------------------------------------------------------------------------------------------------------------------------------------------------------------------------------------------------------------|
| <b>A</b> | 53~64,X,-X,-X,der(X)t(X;3)(q32;q36),t(X;14)(q?;p2?)dup(14)(q21~q22),<br>der(X)t(X;20)(q3?;p12),der(1)t(1;3)(p13;q35)t(1;6)(q55;?),<br>der(3)del(3)(p11)del(3)(q31),der(3)t(3;12)(p11;p11),<br>der(3)t(3;12)(p11;p11)t(12;16)(p12;?),<br>der(3)t(3;14)(p11;q11)del(3)(q3?),+4,+4,der(5)t(5;3)(q36;q11)x2,del(6)(q22~q24),<br>rob(6;6)(q11;q11),der(6;6)(q11;q11)del(6)(q23~q33),der(6;6)(q11;q11)del(6)(q22)t(6;9)(q31;q3?),-8,del(9)(q13),del(9)(q21),der(10)t(10;14)(q31;q22)x2,-11,-12,-12,-14,-14,-15,-15,-16,-17,+18,-19,-19,+mar,+2mar[12] |
| <b>B</b> | 58~62,X,-X,-X,t(X;3)(q32;q36),t(X;14)(q?;p2?)dup(14)(q21~q22),<br>der(1)t(1;3)(p13;q35)t(1;6)(q55;?),der(3)del(3)(p11)del(3)(q31),der(3)t(3;12)(p11;p11),<br>der(3)t(3;12)(p11;p11)t(12;16)(p12;?),der(3)(3;12)(q24;q12)t(12;3)(q11;q11)del(3)(q35~q4),<br>+4,+4,der(5)t(5;3)(q36;q11)x2,del(6)(q22~q24),rob(6;6)(q11;q11),<br>der(6;6)(q11;q11)del(6)(q16~q33),der(6;6)(q11;q11)del(6)(q22)t(6;9)(q31;q3?),-8,-8,<br>del(9)(q13),del(9)(q21),der(10)t(10;14)(q31;q22)x2,-11,-11,-12,-12,-14,-14,-15,-15,-16,+mar[10]                           |
| <b>C</b> | 57~61,-X,-X,der(X)t(X;3)(q32;q36),t(X;14)(q?;p2?)dup(14)(q21~q22),<br>der(3)del(3)(p11)del(3)(q31), der(3)t(3;12)(p11;p11),der(3)t(3;12)(p11;p11)t(12;16)(p12;?),<br>der(3)(3;12)(q24;q12)t(12;3)(q11;q11)del(3)(q35~q43),+4,+4,der(5)t(5;3)(q36;q11)x2,<br>del(6)(q22~q24),rob(6;6)(q11;q11),der(6;6)(q11;q11)del(6)(q22)t(6;9)(q31;q3?),<br>der(6)t(6;14)(q13;q21)ins(12)(6q1~31;?),-8,del(9)(q13),del(9)(q21),<br>der(10)t(10;14)(q31;q22)x2,-11,-12,+13,-14,-15,-16,-17,+18,-19,-20,-20,+mar,+2mar[16]                                      |
