# Supplementary material
Source: publisher figshare collection journal article supplement (https://karger.figshare.com/articles/dataset/_/4047534)

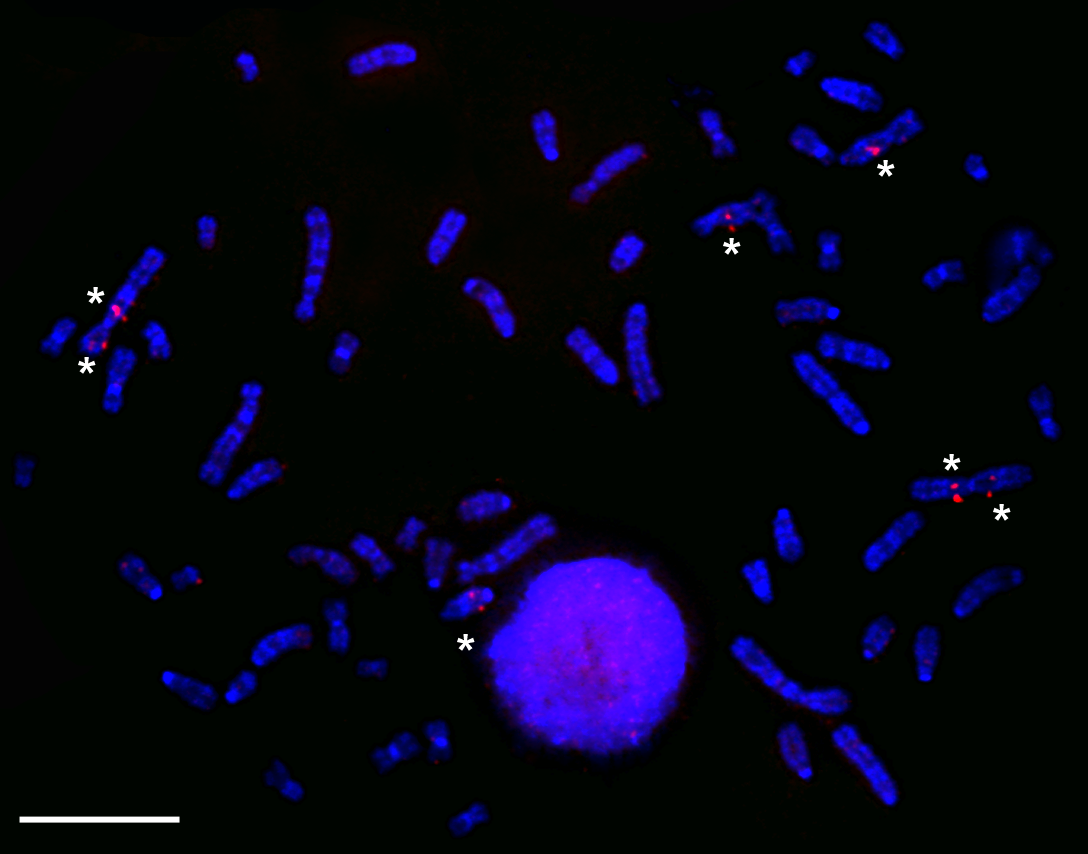

Supplement: Supplementary file 1 [file 1 › CGR9282_Supple_Fig6.tif]

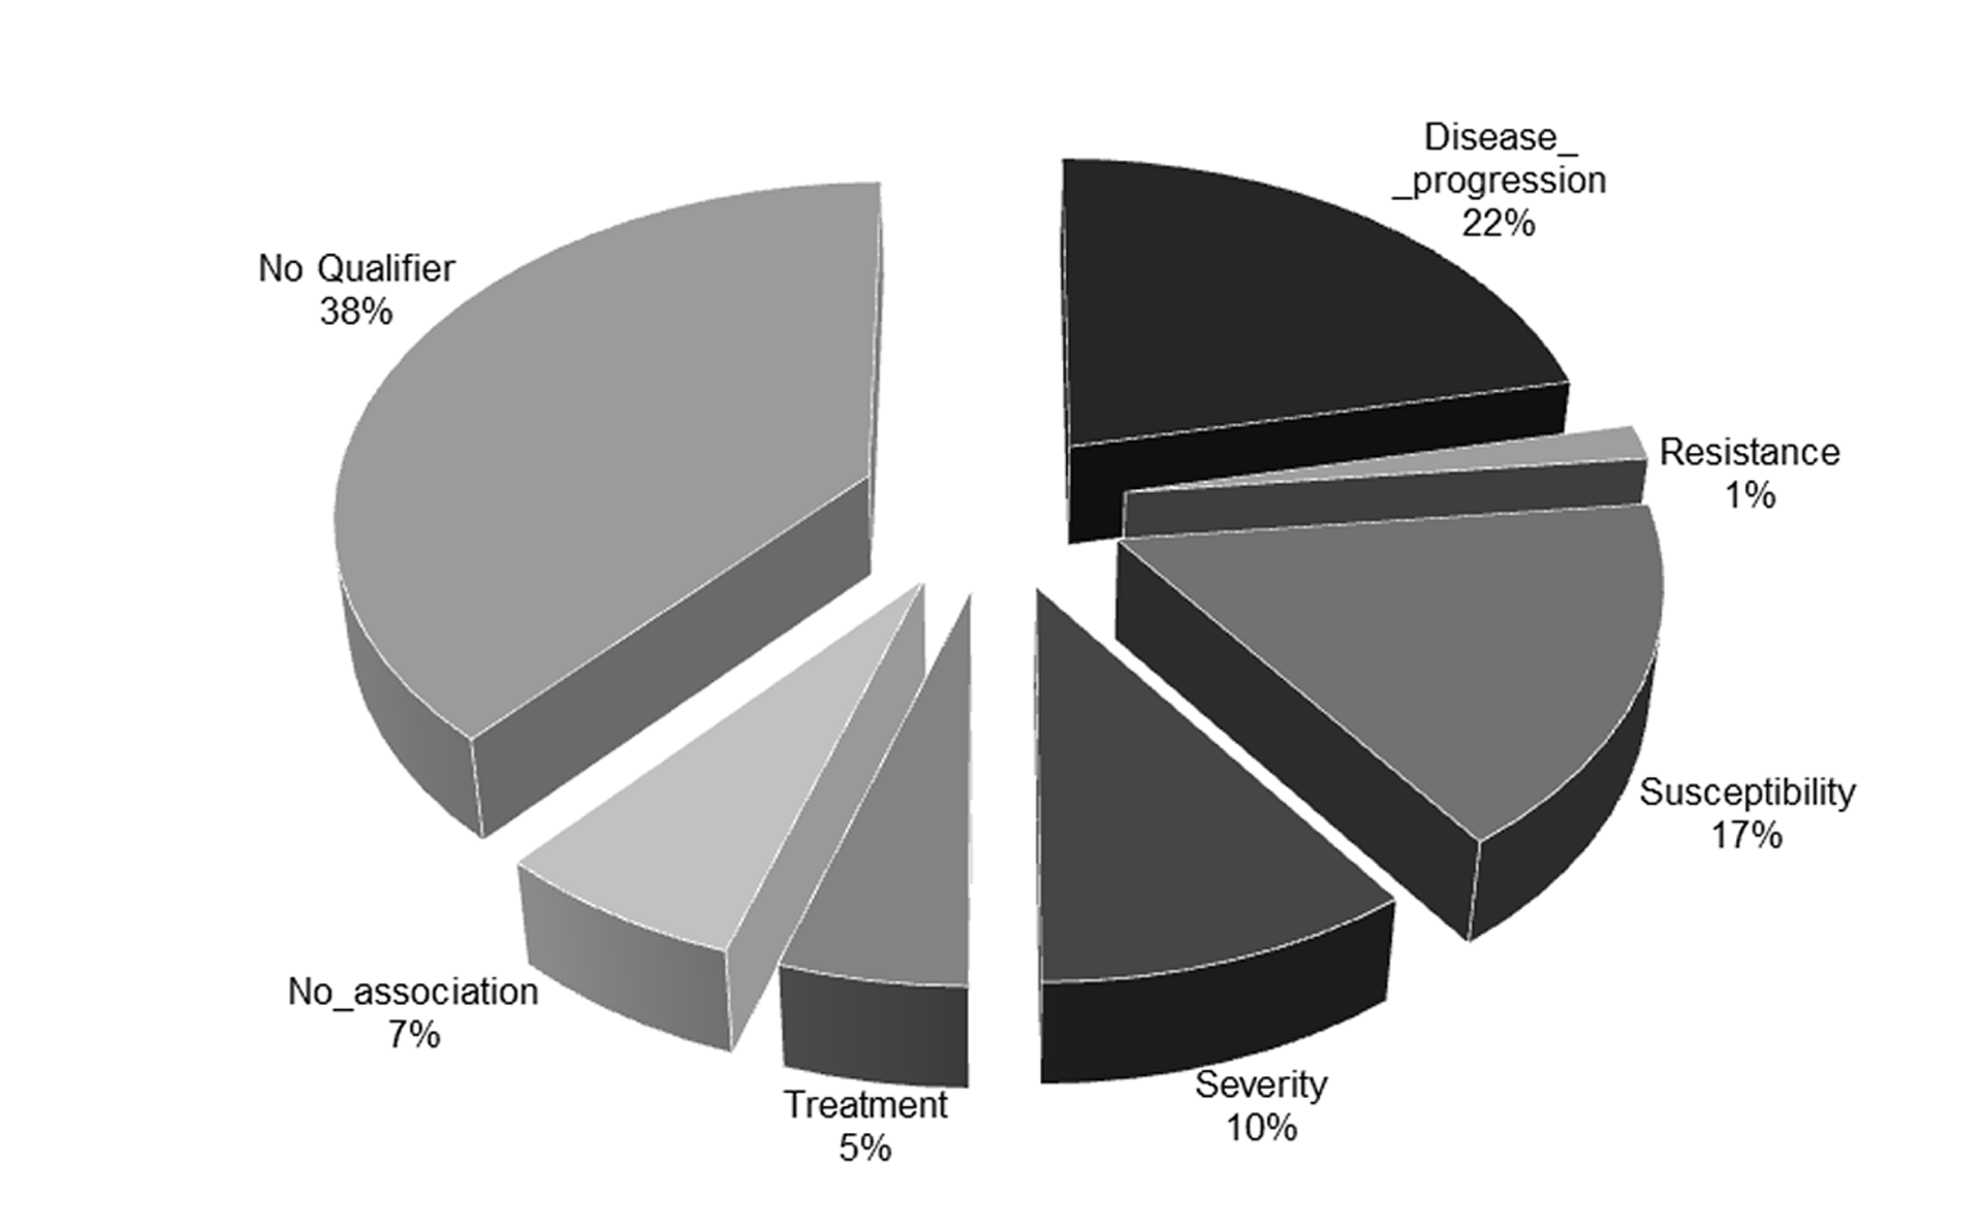

Supplement: Supplementary file 1 [file 1 › CGR9282_Supple_Fig5.tif]

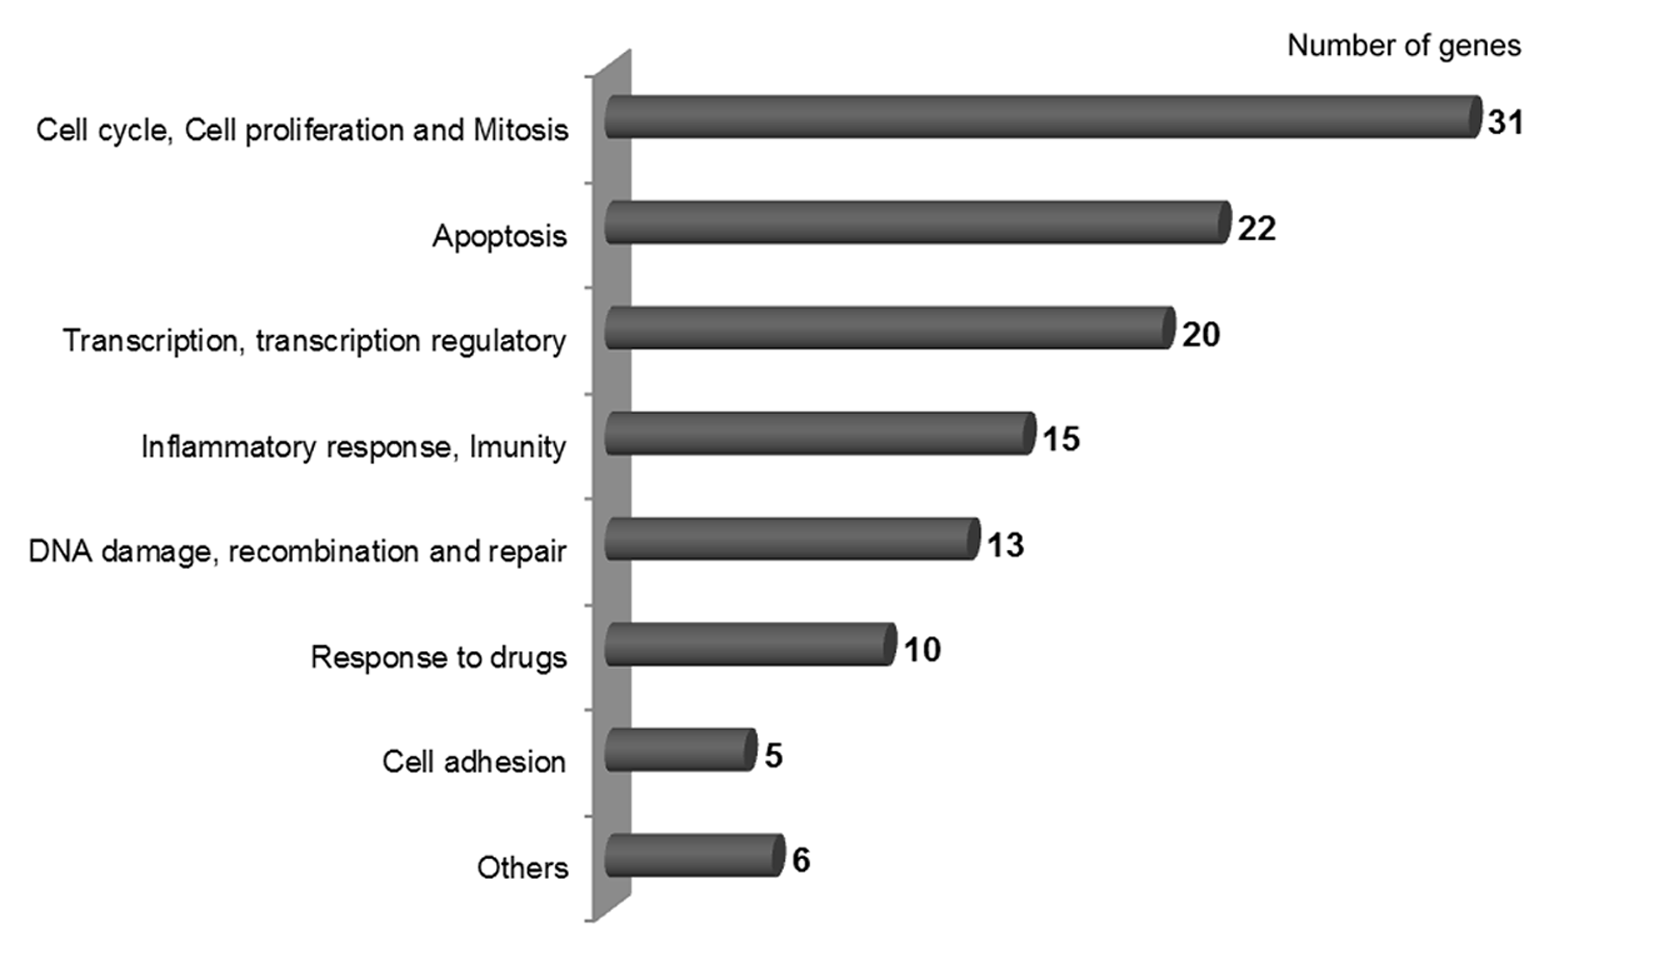

Supplement: Supplementary file 1 [file 1 › CGR9282_Supple_Fig4.tif]

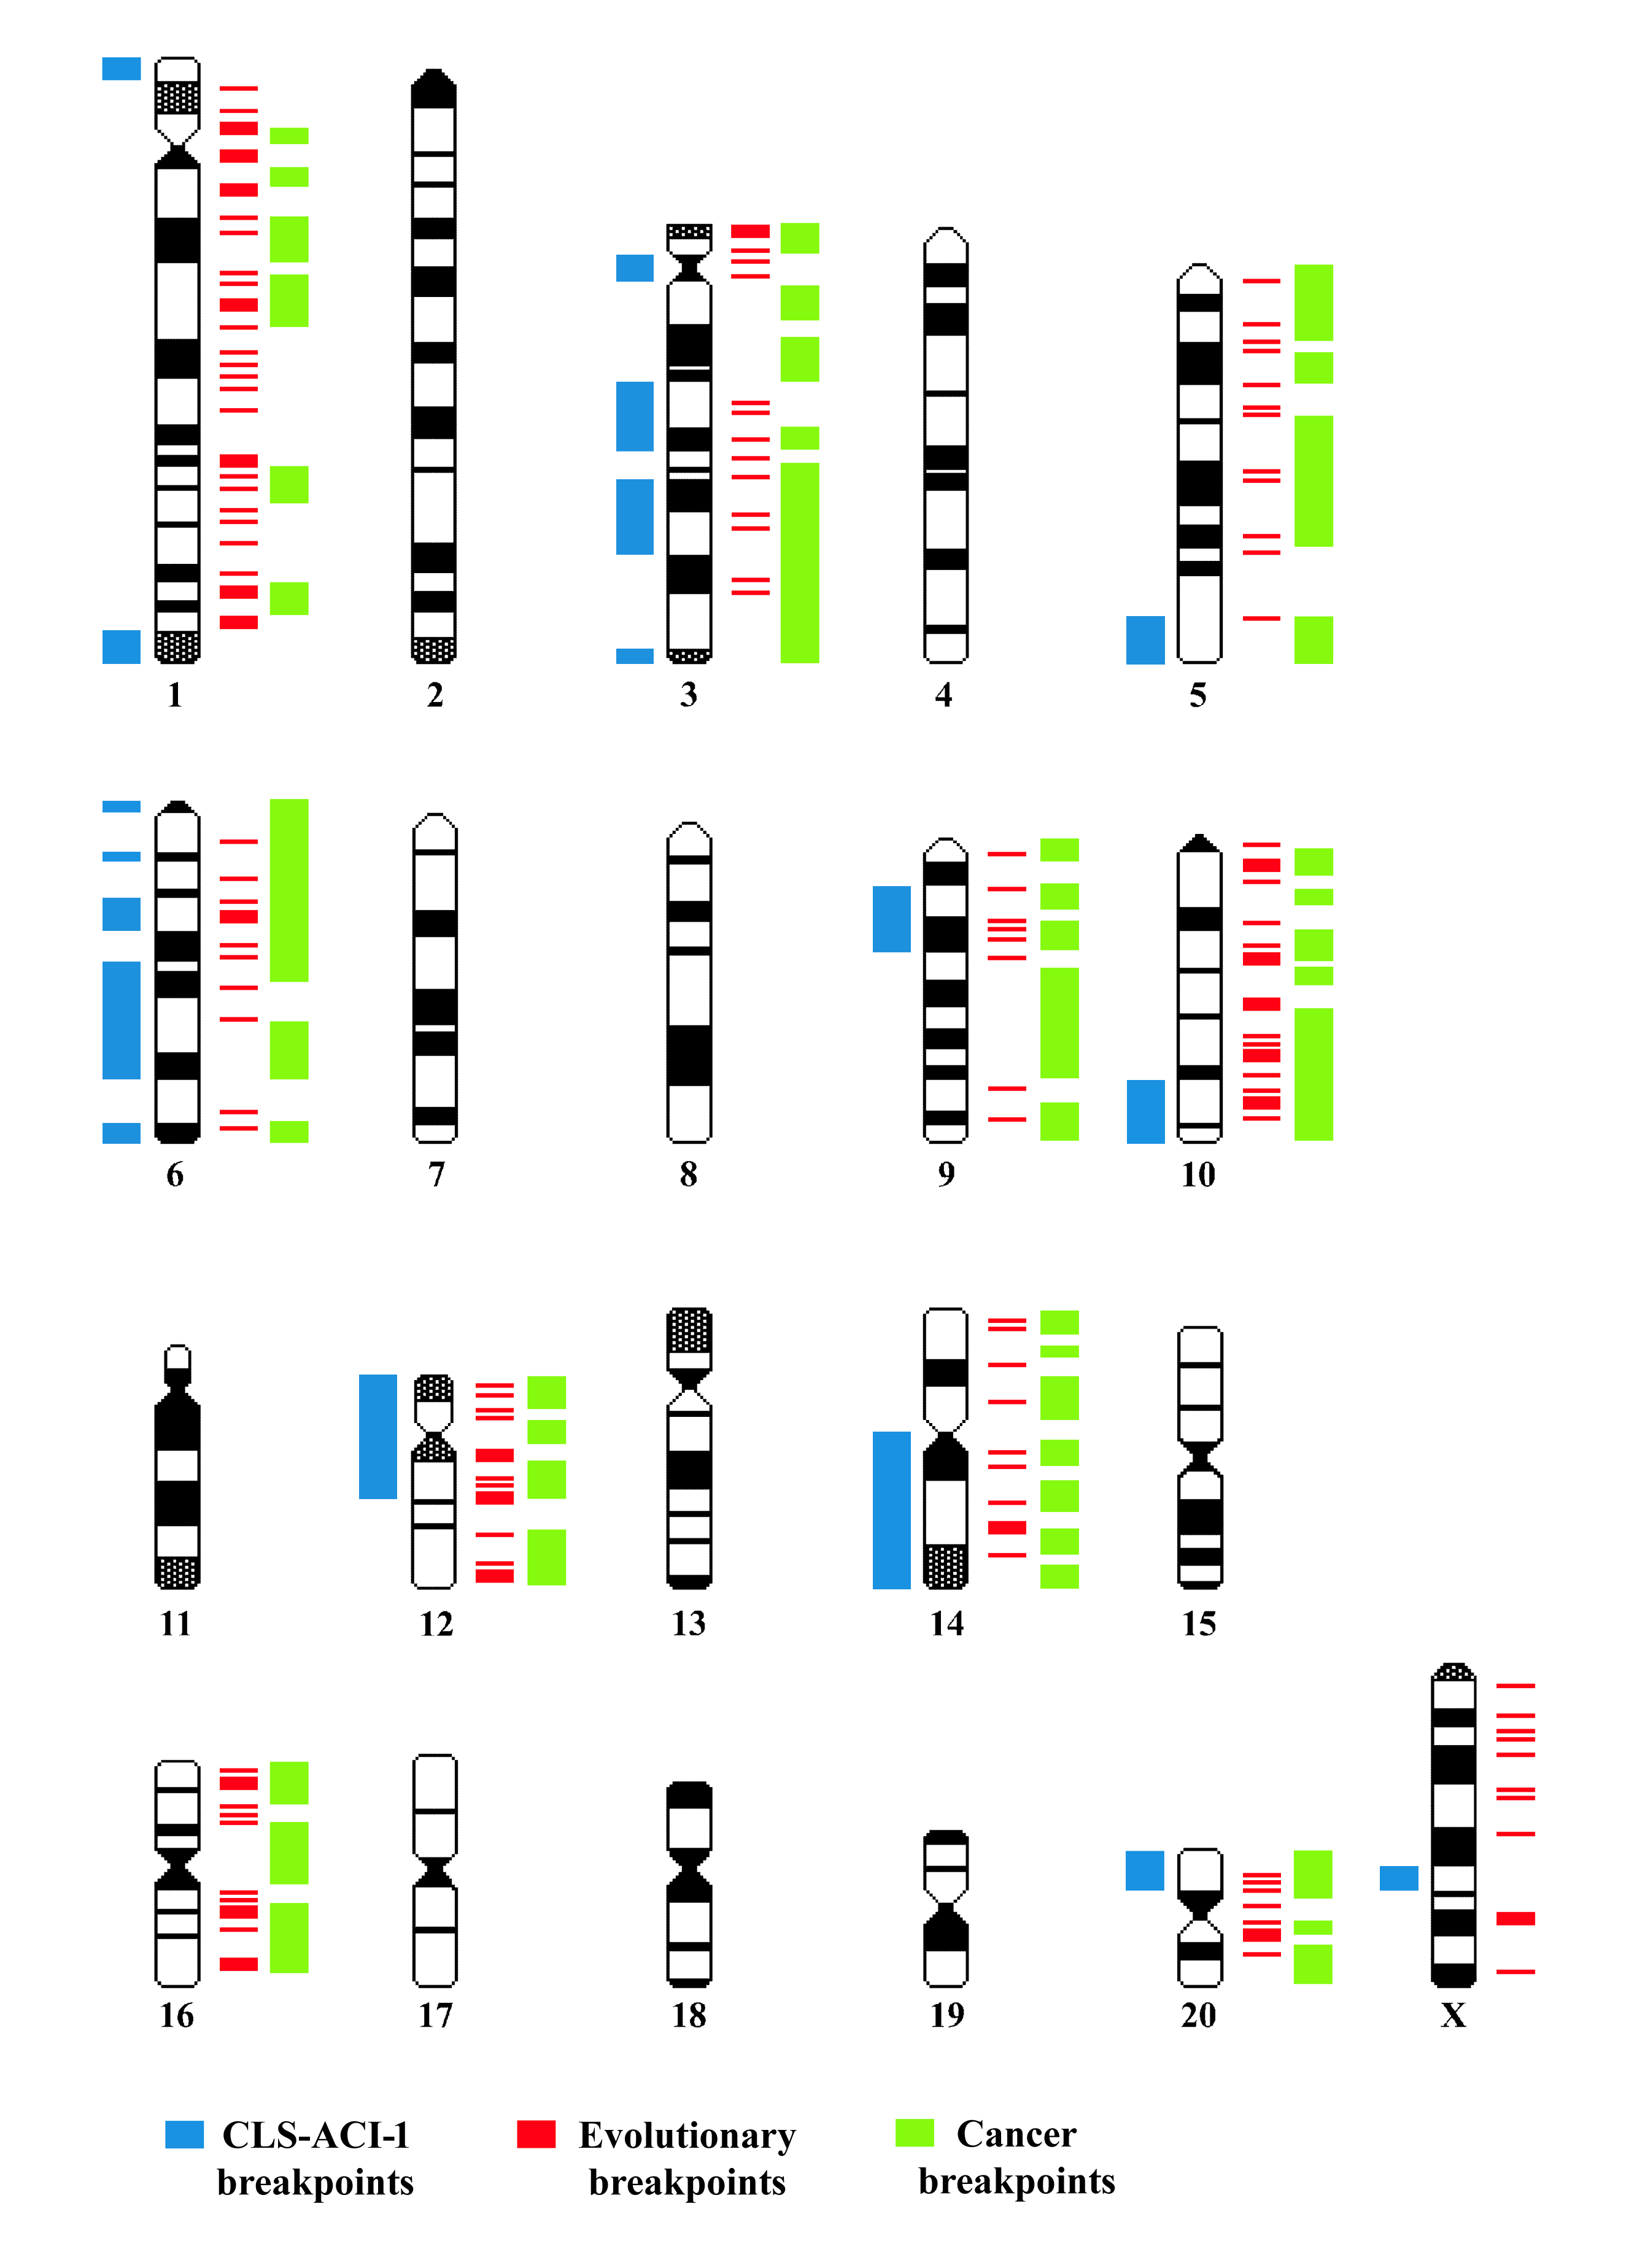

Supplement: Supplementary file 1 [file 1 › CGR9282_Supple_Fig3.tif]

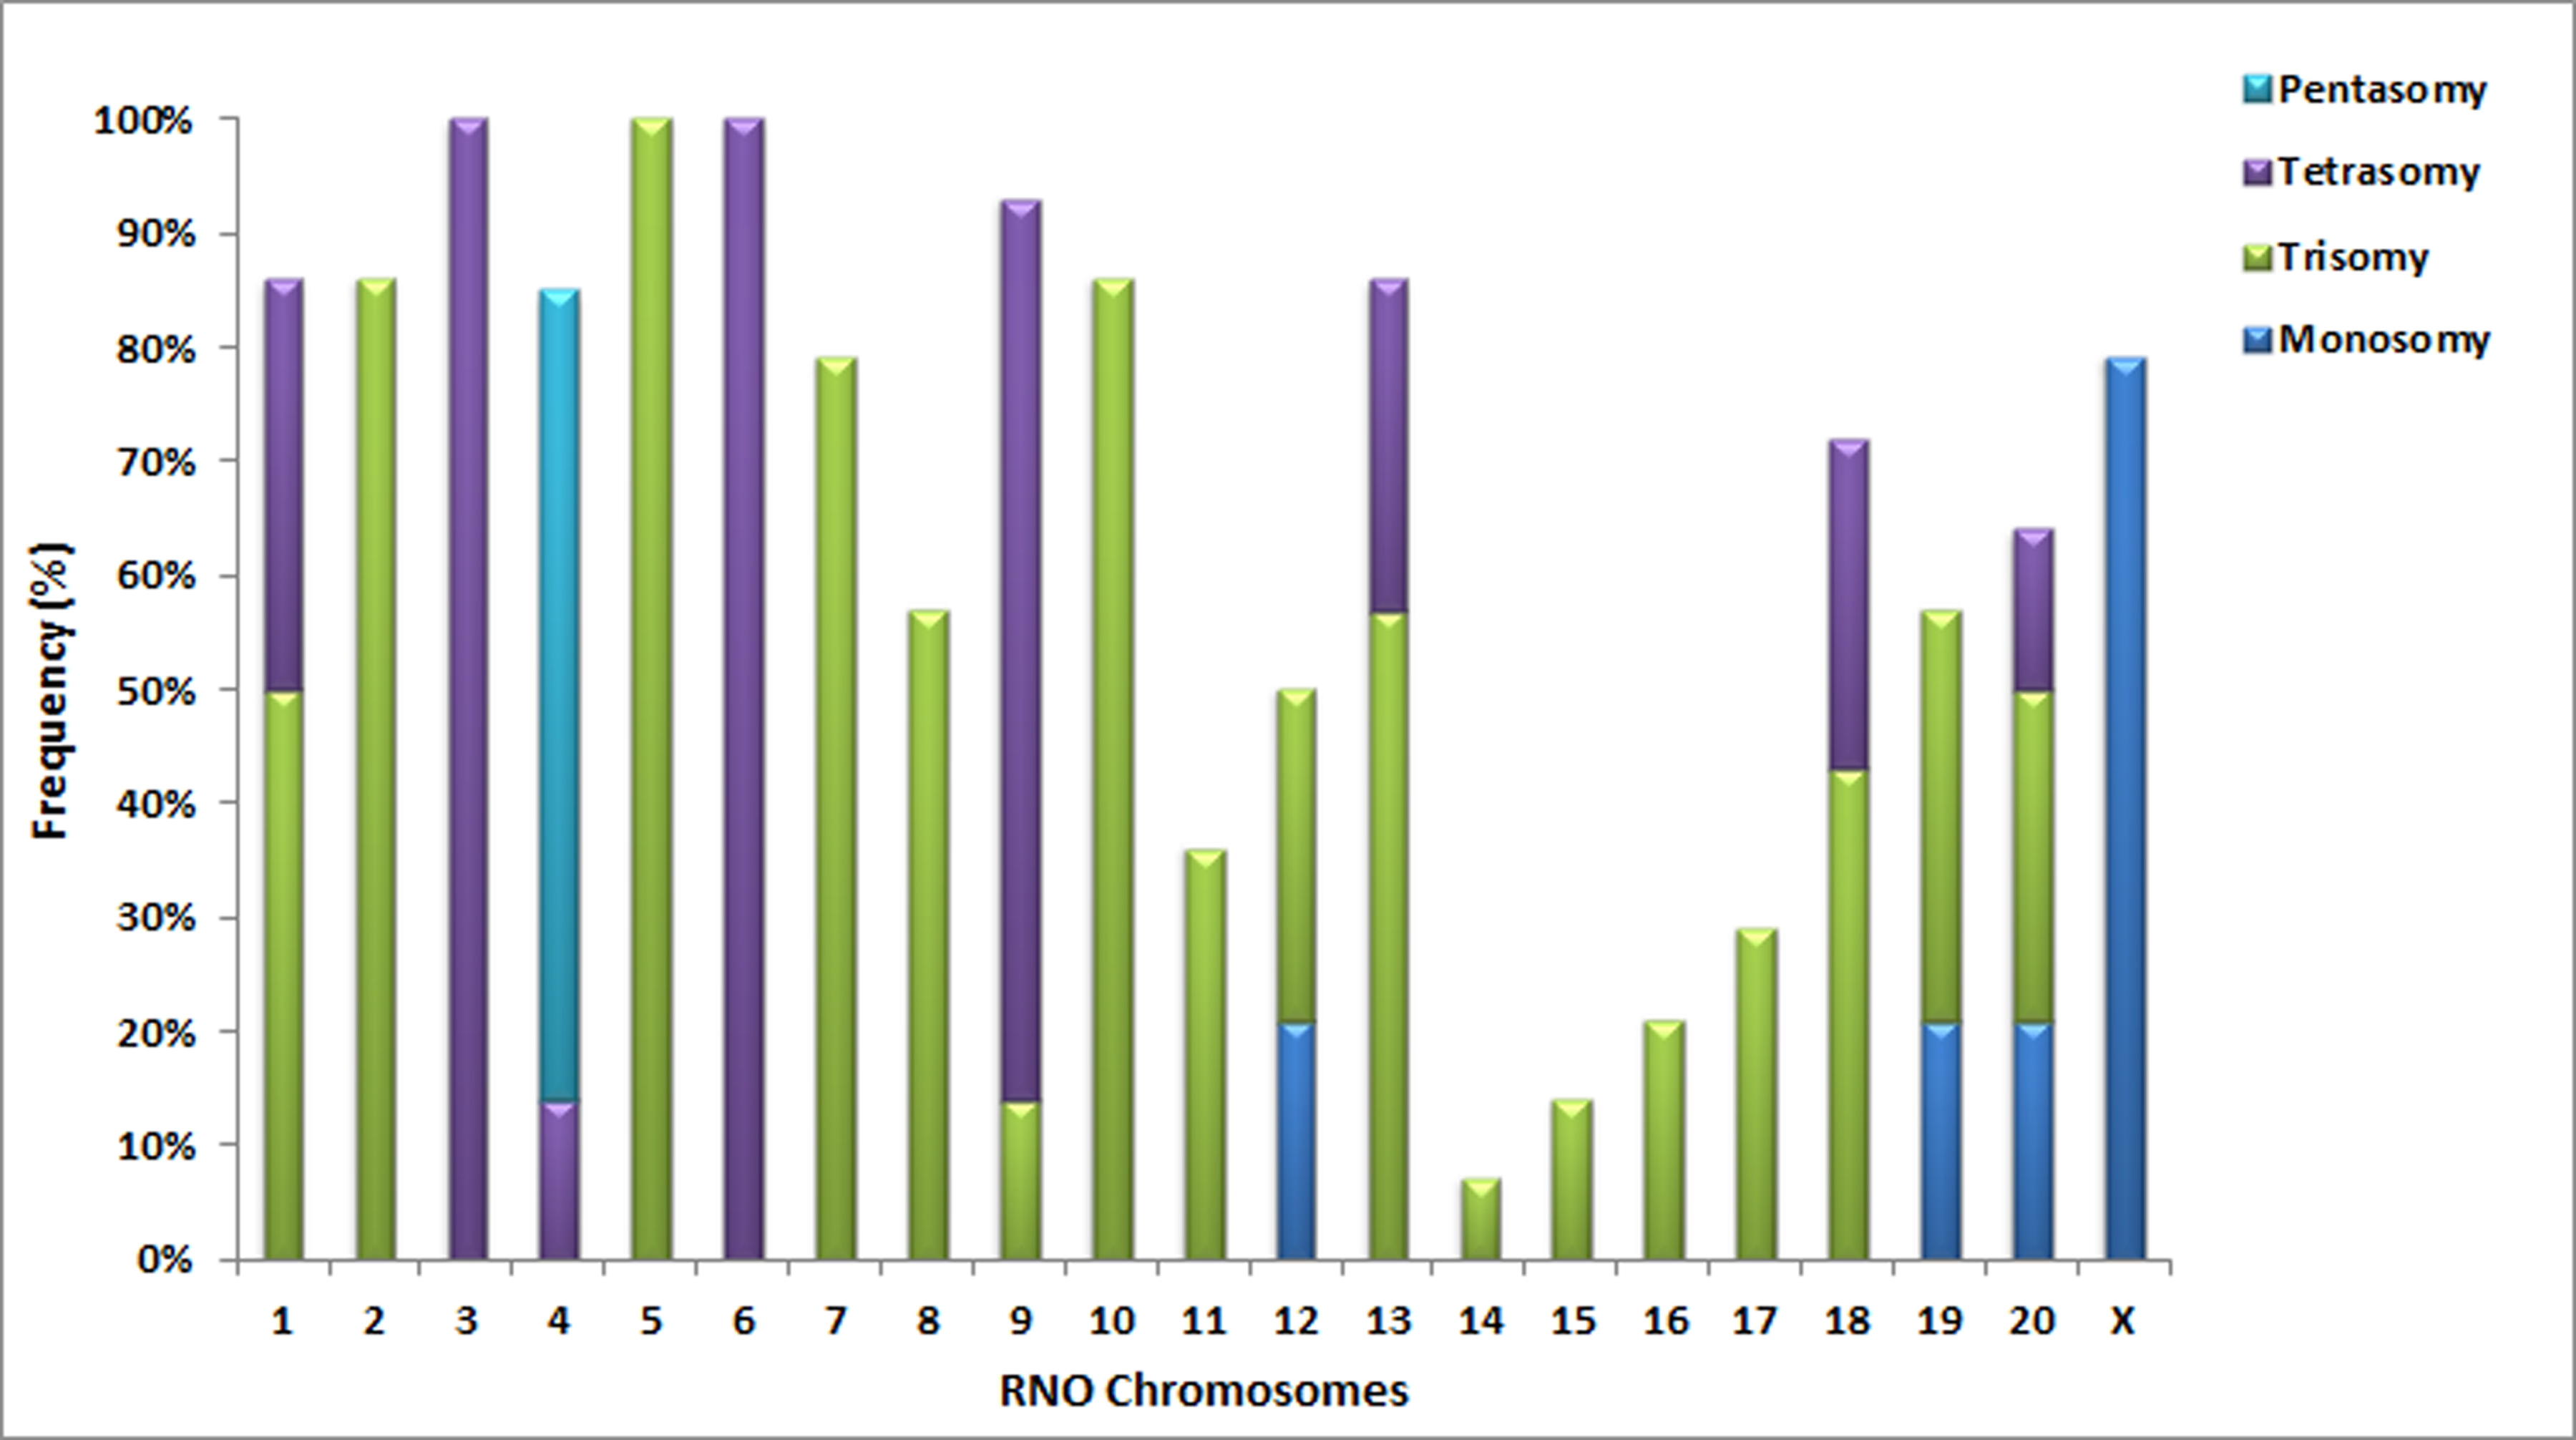

Supplement: Supplementary file 1 [file 1 › CGR9282_Supple_Fig2.tif]

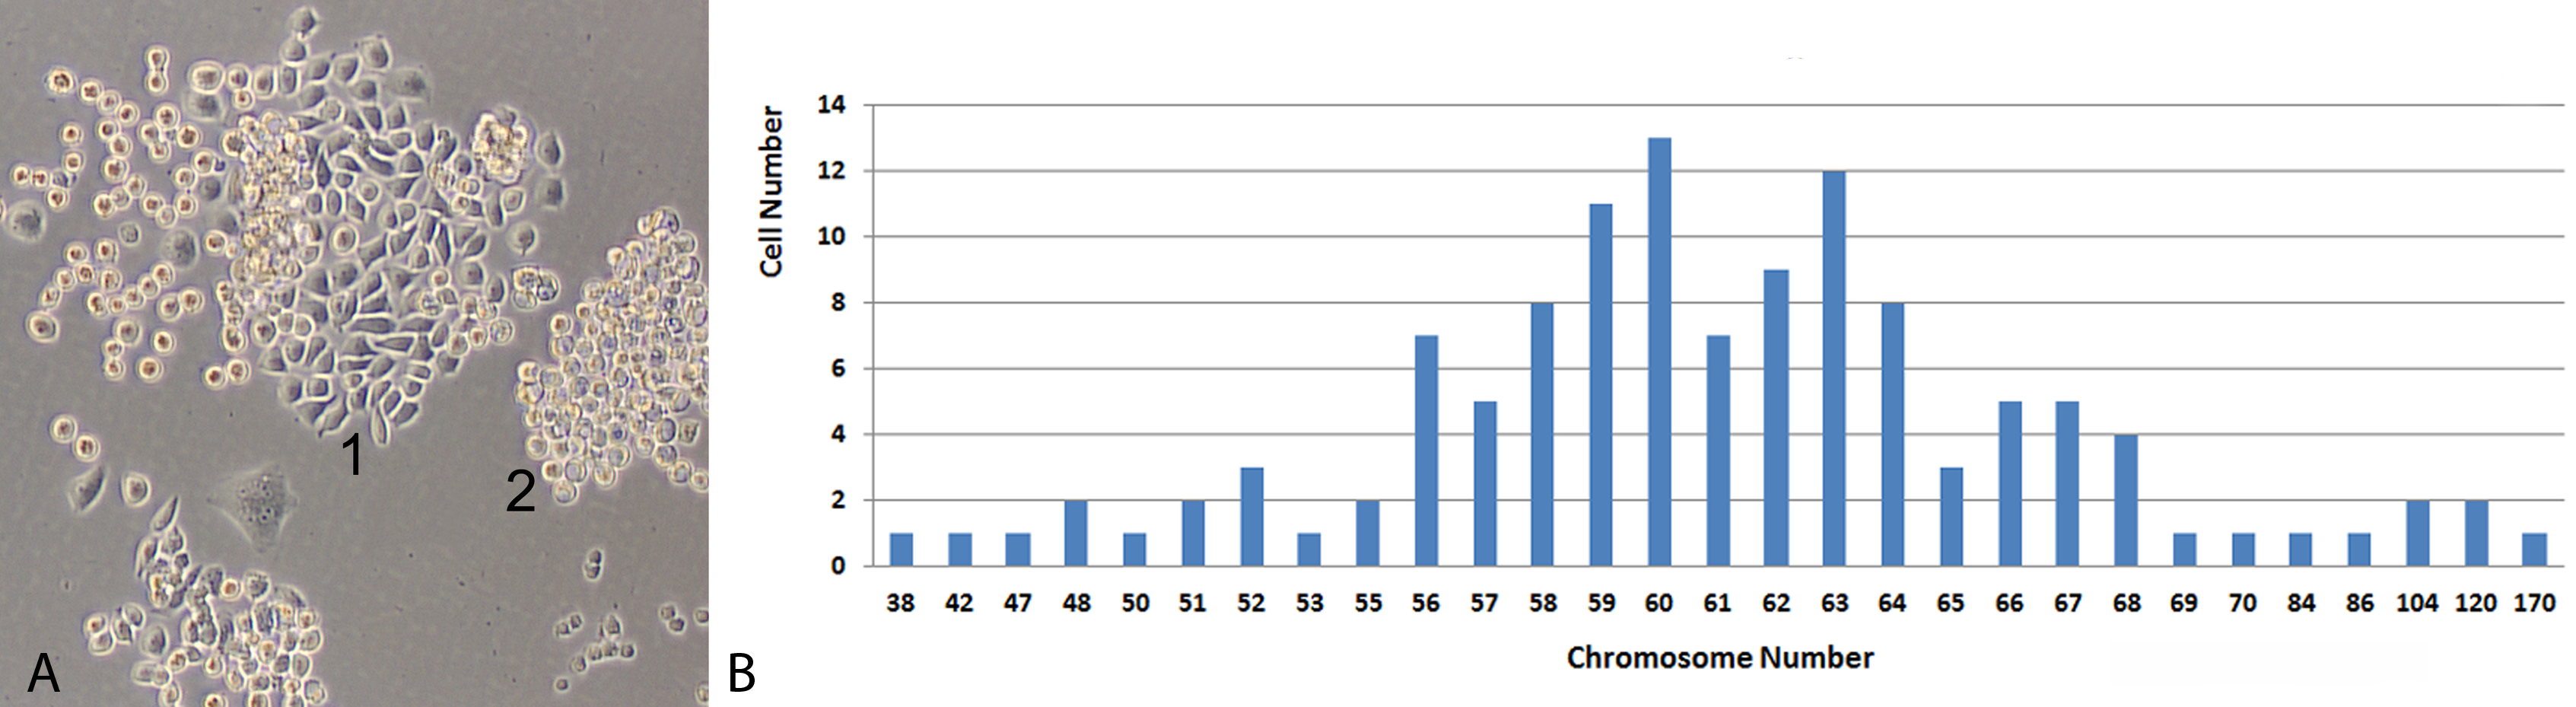

Supplement: Supplementary file 1 [file 1 › CGR9282_Supple_Fig1.tif]
